# Supplementary material
Source: Royal Society of Chemistry journal article supplement (doi:10.1039/d6ay00357e)
Supplement: d6ay00357e1.pdf [file d6ay00357e1.pdf]

Supplementary information

Sensitive Detection and Prostate Cancer Cellular Evaluation of Sarcosine via a Fluorescence Turn-On Assay Using an N-CQDs/Ag<sup>+</sup> Nanosensor

Xinyu Shen<sup>1#</sup>, Suli He<sup>2#</sup>, Lezhong Qi<sup>1</sup>, Xiayong Jing<sup>1</sup>, Xinqiang Gan<sup>1</sup>, Xingjun He<sup>1\*</sup>

<sup>1</sup>Department of Urology, Affiliated Hospital of Yangzhou University, No. 368 Hanjiang Middle Road, Yangzhou, Jiangsu, China

<sup>2</sup>Department of Obstetrics and Gynecology, Affiliated Hospital of Yangzhou University, No. 45 Taizhou Road, Yangzhou, Jiangsu, China

<sup>#</sup>These authors contributed equally to this work.

\*Corresponding author: Xingjun He

E-mail: xingjunhe1982@163.com

## Materials and Reagents

Sarcosine oxidase (SOx, from *Bacillus* sp.,  $\geq 95\%$  purity, activity  $\geq 20$  U/mg), sarcosine ( $\geq 98\%$ ), silver nitrate ( $\text{AgNO}_3$ ,  $\geq 99.8\%$ ), and all other salts and chemicals were of analytical reagent grade and purchased from Sigma-Aldrich (St. Louis, MO, USA) or Aladdin Biochemical Technology Co., Ltd. (Shanghai, China). Phosphate-buffered saline (PBS, 10 mM, pH 7.4) was prepared using sodium phosphate dibasic and sodium phosphate monobasic. All aqueous solutions were prepared using ultrapure water (resistivity  $\geq 18.2$  M $\Omega$ ·cm) from a Millipore Milli-Q system.

The human prostate cell lines used in this study were obtained from the Cell Bank of the Chinese Academy of Sciences (Shanghai, China). These included the androgen-independent prostate cancer cell line PC-3, the androgen-sensitive prostate cancer cell line LNCaP, and the benign prostatic hyperplasia epithelial cell line BPH-1, which served as a non-malignant control.

## Instrument

Fluorescence emission and excitation spectra were recorded on a Hitachi F-7100 fluorescence spectrophotometer (Tokyo, Japan) equipped with a 150 W xenon lamp. For all measurements, the excitation and emission slit widths were set at 5.0 nm. Ultraviolet-visible (UV-vis) absorption spectra were acquired using a Shimadzu UV-2700 spectrophotometer (Kyoto, Japan). The morphology and size of the nanomaterials were characterized by transmission electron microscopy (TEM) on a JEOL JEM-2100 microscope (Tokyo, Japan) operating at an acceleration voltage of 200 kV. For TEM sample preparation, a droplet of the diluted nanoparticle suspension was placed onto a carbon-coated copper grid and air-dried at room temperature. X-ray photoelectron spectroscopy (XPS) analysis was performed on a Thermo Scientific K-Alpha+ spectrometer (Waltham, MA, USA). All cell culture procedures were conducted in the incubator (Thermo Fisher Scientific, USA) maintained at 37 °C with a humidified atmosphere of 5% CO<sub>2</sub>.

## Synthesis of N-CQDs

N-doped carbon quantum dots (N-CQDs) were synthesized via a facile one-pot hydrothermal method. Briefly, 2.0 g of thoroughly washed and vacuum-dried castor seeds were ground into fine powder, dispersed in 30 mL deionized water, and sonicated at room temperature for 30 min to form a uniform suspension. The dispersion was transferred into a 50 mL Teflon-lined stainless-steel autoclave, sealed, and heated in an electric oven at 180 °C for 10 h. After natural cooling to ambient temperature, the resulting brownish solution was centrifuged at 8000 rpm for 15 min, filtered through a 0.22  $\mu\text{m}$  hydrophilic PVDF membrane, and dialyzed (MWCO: 1000 Da) against deionized water for 48 h (water renewed every 12 h) to remove impurities and small-molecule byproducts. The purified N-CQDs aqueous solution was stored in a sealed container at 4 °C for subsequent use.

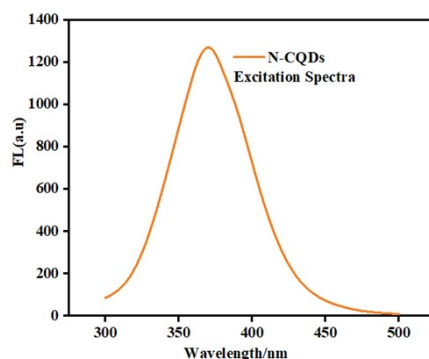

Figure S1. Excitation spectra of the N-CQDs.

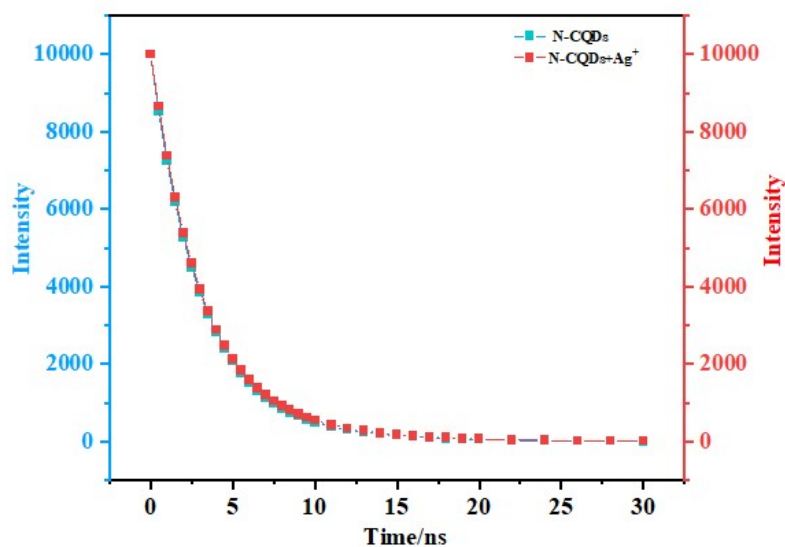

Figure S2. Fluorescence decay curves of N-CQDs in the absence (green squares) and presence (red circles) of 100  $\mu\text{M}$   $\text{Ag}^+$ . Excitation wavelength: 380 nm; emission monitored at 450 nm. The nearly identical decay profiles indicate that the fluorescence quenching by  $\text{Ag}^+$  follows a static quenching mechanism, consistent with the formation of a non-fluorescent ground-state N-CQDs/ $\text{Ag}^+$  complex.

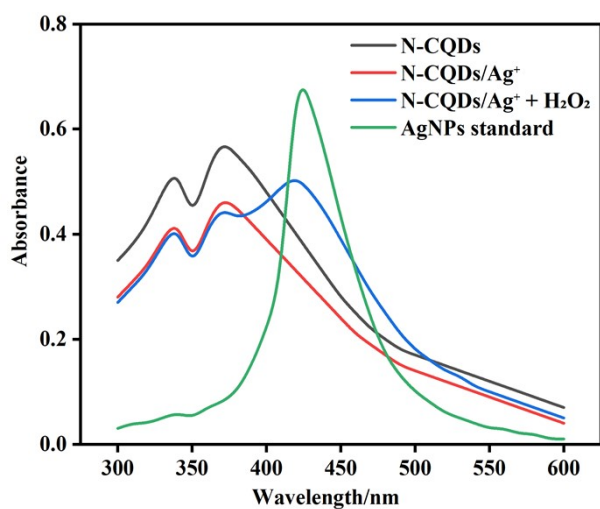

Figure S3. UV-Vis absorption spectra confirming the  $\text{H}_2\text{O}_2$ -mediated reduction of  $\text{Ag}^+$  to  $\text{Ag}^0$ . Spectra of N-CQDs alone (black), N-CQDs/ $\text{Ag}^+$  (red), and N-CQDs/ $\text{Ag}^+$  after treatment with  $\text{H}_2\text{O}_2$  (blue), and spectrum of the Ag NP standard (green).

Table S1. Spike recovery of sarcosine in fetal bovine serum (FBS) at different concentrations

| Spiked Sarcosine ( $\mu\text{M}$ ) | Measured Sarcosine ( $\mu\text{M}$ ) | Recovery (%) | RSD (% , n=3) |
|------------------------------------|--------------------------------------|--------------|---------------|
| 10.0                               | 10.25                                | 98.3         | 4.1           |
| 20.0                               | 19.60                                | 95.9         | 2.6           |
| 40.0                               | 39.45                                | 97.6         | 2.4           |

Table S2. Comparison of the proposed method with existing analytical methods for sarcosine detection

| Method                   | Material/<br>Platform        | LOD<br>( $\mu\text{M}$ ) | Linear<br>Range<br>( $\mu\text{M}$ ) | Detection<br>Time | Advantages                                              | Limitations                       | Ref  |
|--------------------------|------------------------------|--------------------------|--------------------------------------|-------------------|---------------------------------------------------------|-----------------------------------|------|
| <b>This work</b>         | <b>N-CQDs/Ag<sup>+</sup></b> | <b>2.1</b>               | <b>10-60</b>                         | <b>30 min</b>     | <b>Turn-on,<br/>selective,<br/>cell-<br/>compatible</b> | <b>Moderate<br/>LOD</b>           | —    |
| LC-MS/MS                 | —                            | 0.000<br>05-<br>0.004    | 0.003-<br>40                         | Hours             | Ultra-high<br>sensitivity,<br>accurate                  | Expensive,<br>complex,<br>not POC | [S1] |
| Fluorescence (turn-on)   | Co-doped<br>CQDs             | 1.54                     | 0–10                                 | Not<br>specified  | Turn-on,<br>sensitive                                   | Narrow<br>linear range            | [S2] |
| Ratiometric fluorescence | MOF<br>nanozyme              | 0.039<br>98              | Not<br>specifi<br>ed                 | Not<br>specified  | Ultra-<br>sensitive                                     | Complex<br>preparation            | [S3] |
| Colorimetric             | Various<br>nanozymes         | 0.008<br>-500            | 0.1-<br>100                          | Minutes           | Simple, low-<br>cost                                    | Lower<br>sensitivity              | [S4] |
| Electrochemical          | CoNiWBO/rG<br>O              | 0.04                     | 0.1-50                               | Fast              | Portable,<br>rapid, non-<br>enzymatic                   | Stability<br>issues               | [S5] |
| Electrochemical          | Various<br>electrodes        | Dow<br>n to<br>nM        | Variab<br>le                         | Fast              | Portable,<br>rapid                                      | Stability<br>issues               | [S6] |
| Colorimetric (MIP)       | Zn/Ce-<br>ZIF@MIP            | Not<br>speci<br>fied     | Not<br>specifi<br>ed                 | Minutes           | High<br>specificity,<br>molecular<br>imprinting         | Complex<br>preparation            | [S7] |

## References

- [S1] Jiang Y, Cheng X, Wang C, et al. Quantitative determination of sarcosine and related compounds in urinary samples by liquid chromatography with tandem mass spectrometry. *Analytical chemistry*, 2010, 82(21): 9022-9027.
- [S2] Zeyadi M, Chaudhari K G, Patil P O, et al. Development of a highly sensitive fluorescent probe using *Delonix regia* (Gulmohar) tree pod shell for precise sarcosine detection in human urine samples: advancing prostate cancer diagnosis. *Journal of Biomolecular Structure and Dynamics*, 2025, 43(10): 4928-4941.
- [S3] Hou J, Wang J, Han J, et al. An intelligent ratiometric fluorescent assay based on MOF nanozyme-mediated tandem catalysis that guided by contrary logic circuit for highly sensitive sarcosine detection and smartphone-based portable sensing application. *Biosensors and Bioelectronics*, 2024, 249: 116035.
- [S4] Venugopal Iyer V, Rajendran R, Selvaraj S. Colorimetric and electrochemical sensors for the detection of sarcosine, a potential biomarker for prostate cancer: a review. *Current Analytical Chemistry*, 2024, 20(1): 2-13.
- [S5] Wasim M, Shaheen S, Fatima B, et al. Non-enzymatic electrochemical detection of sarcosine in serum of prostate cancer patients by CoNiWBO/rGO nanocomposite. *Scientific Reports*, 2024, 14(1): 24240.
- [S6] Pundir C S, Deswal R, Kumar P. Quantitative analysis of sarcosine with special emphasis on biosensors: a review. *Biomarkers*, 2019, 24(5): 415-422.
- [S7] Liu P, Liu Y, Gai Z, et al. Highly specific colorimetric detection of sarcosine using surface molecular imprinted Zn/Ce-ZIF. *Journal of Colloid and Interface Science*, 2025, 681: 239-249.
